# Supplementary material for: Porous polyurethanes based on hyperbranched amino ethers of boric acid
Source: Royal Society of Chemistry journal article supplement (doi:10.1039/c6ra21638b), 2016-01-01
Supplement: c6ra21638b1.pdf [file c6ra21638b1.pdf]

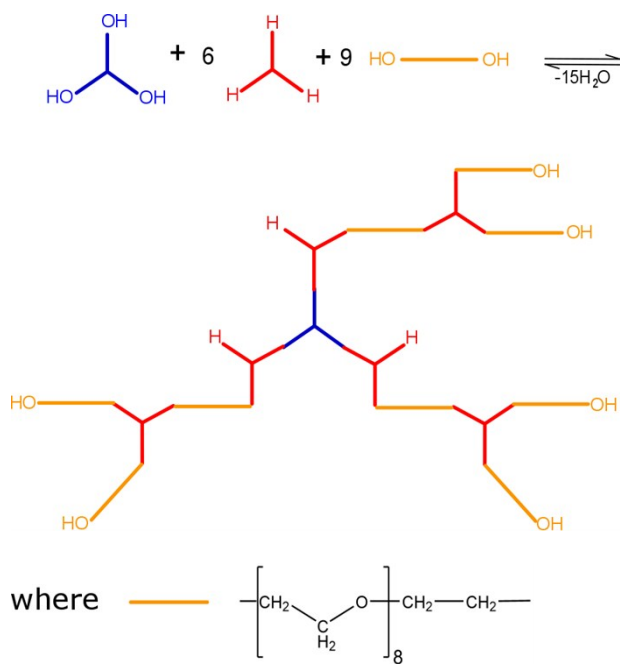

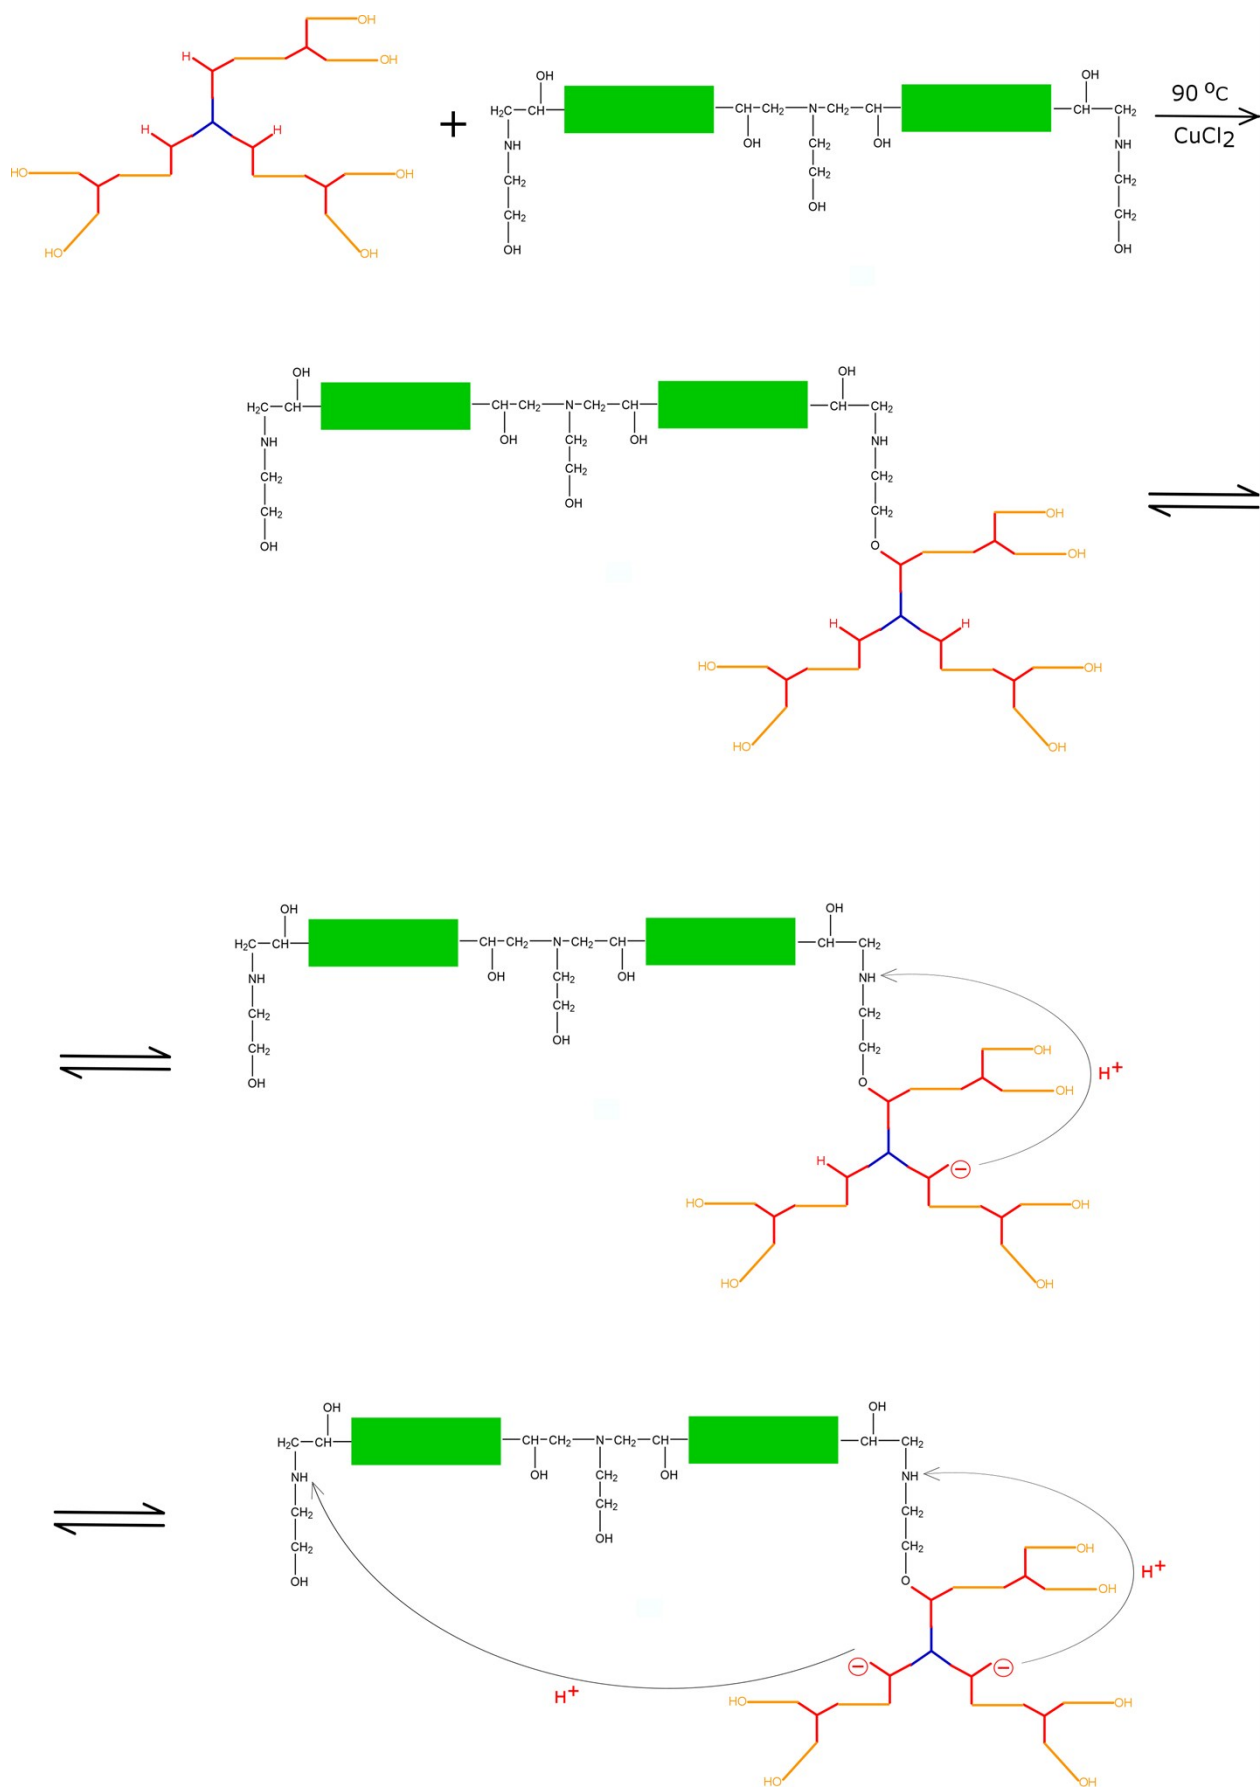

Scheme 1 – Formation of intramolecular interactions in AEBA-EM

I stage:

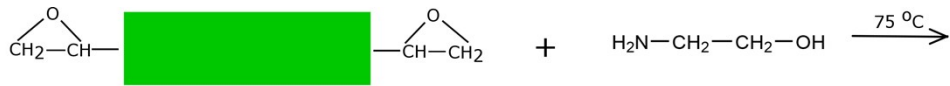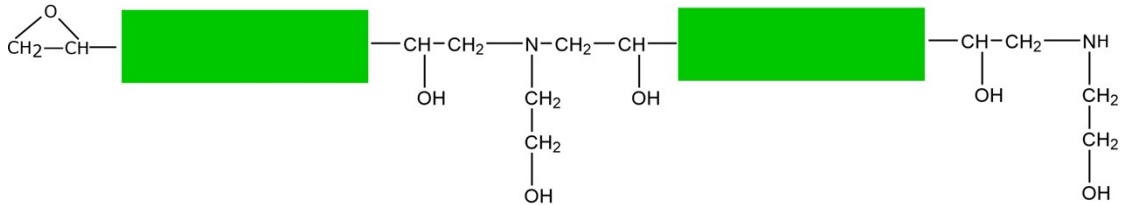

II stage:

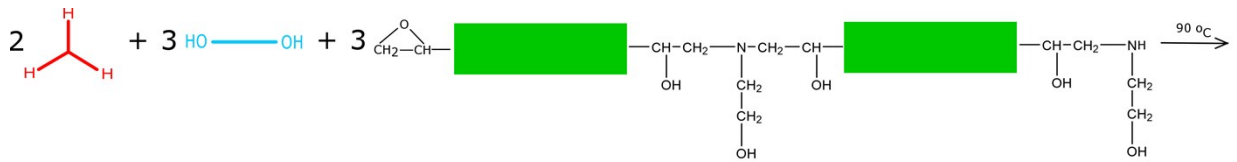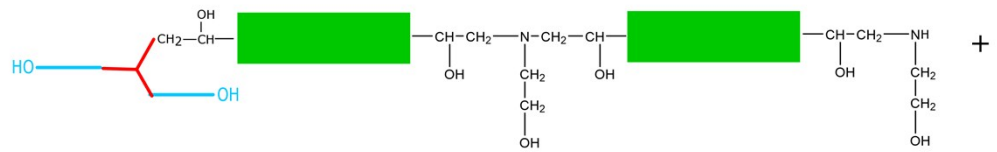

R1

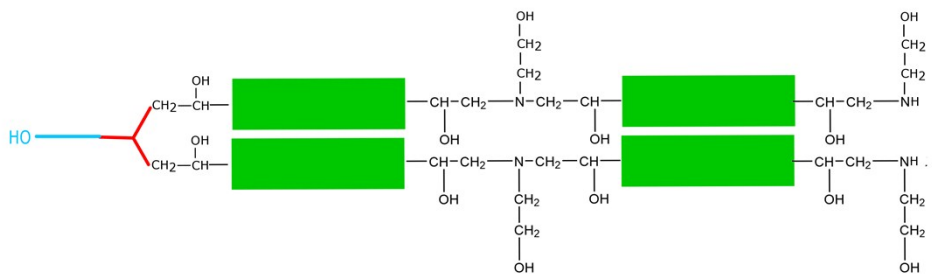

R2

III stage:

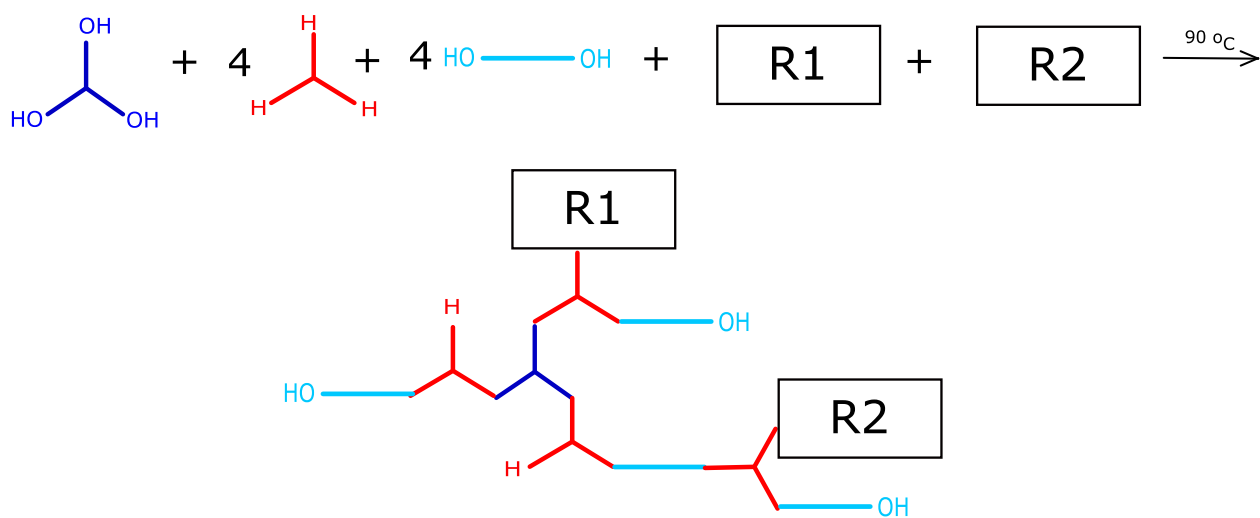

Scheme 2 – Formation of EMB on the basis of ED-20, MEA and PEG
